# Supplementary material
Source: Frontiers journal article supplement (https://www.frontiersin.org/articles/294079)
Supplement: Image_4.PDF [file Image_4.PDF]

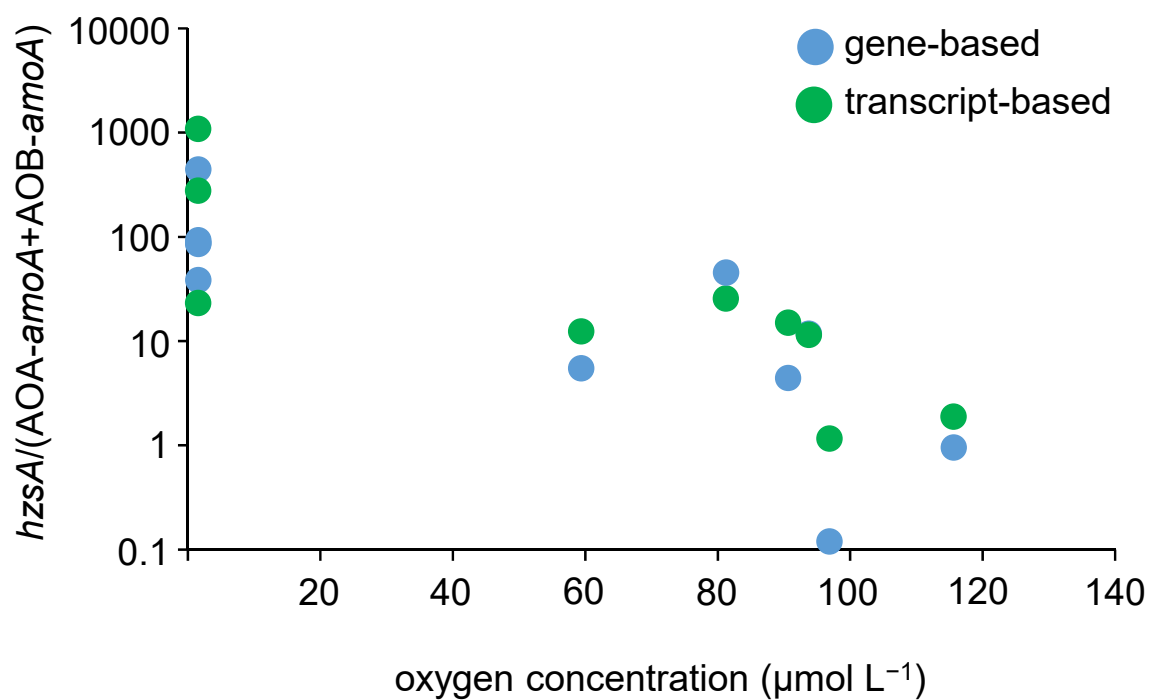

**Supplementary Figure 4.** Ratios of [ $hzsA/\text{sum of archaeal and bacterial } amoA$ ] plotted against the oxygen concentration in the respective groundwater sample. Data are based on ten groundwater samples obtained from five groundwater wells in August and November 2015. Blue dots: DNA-based analysis. Green dots: Transcript-based analysis.
